# Supplementary material for: Falcon gut microbiota is shaped by diet and enriched in Salmonella
Source: PubMed Central journal article supplement (PMC10826950; doi:10.1371/journal.pone.0293895), 2024-01-30

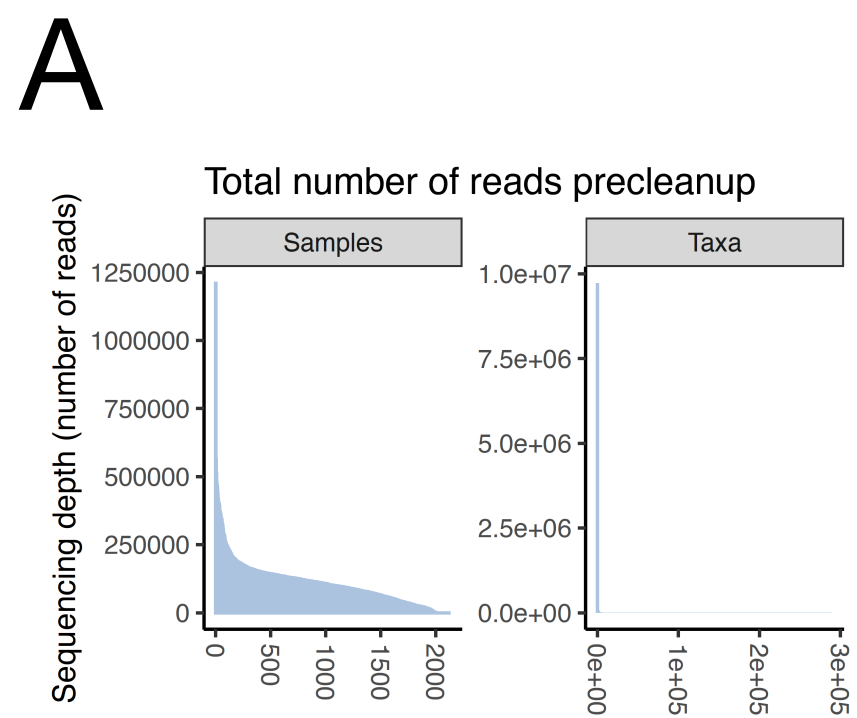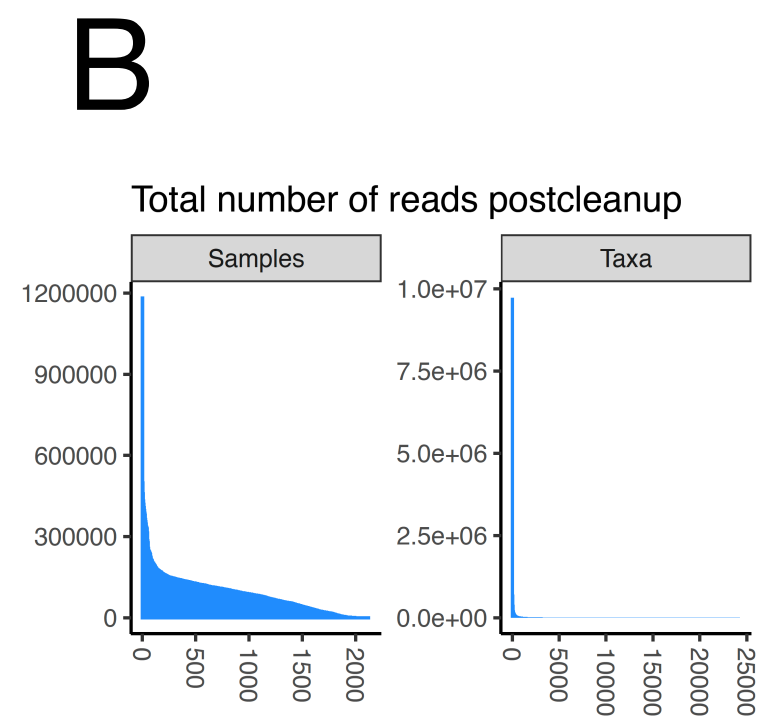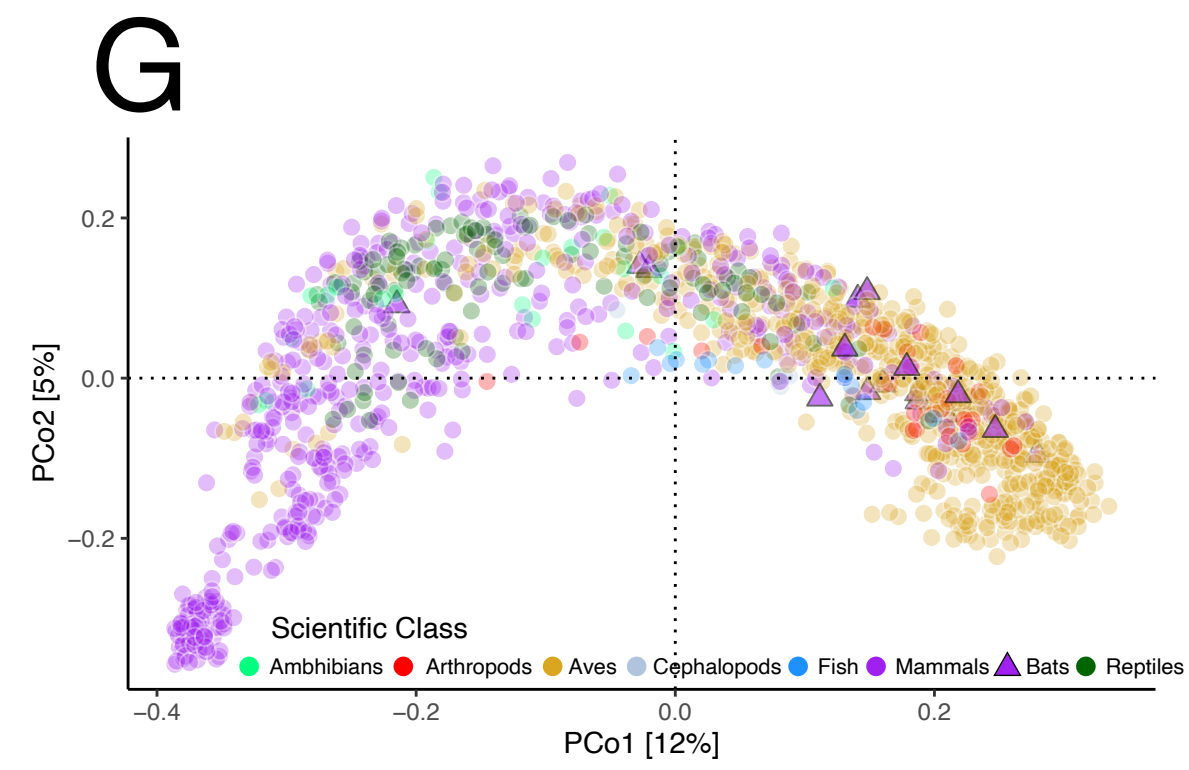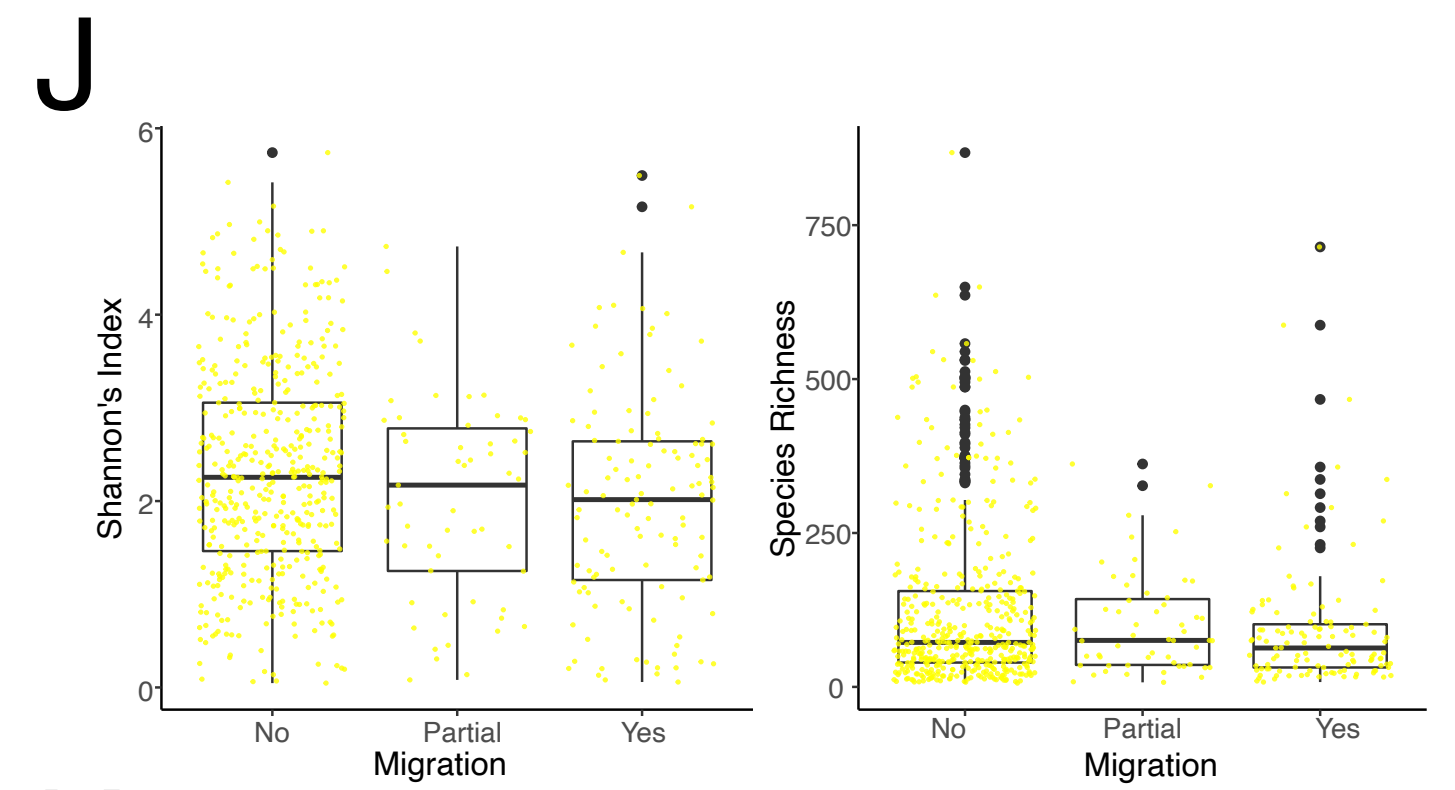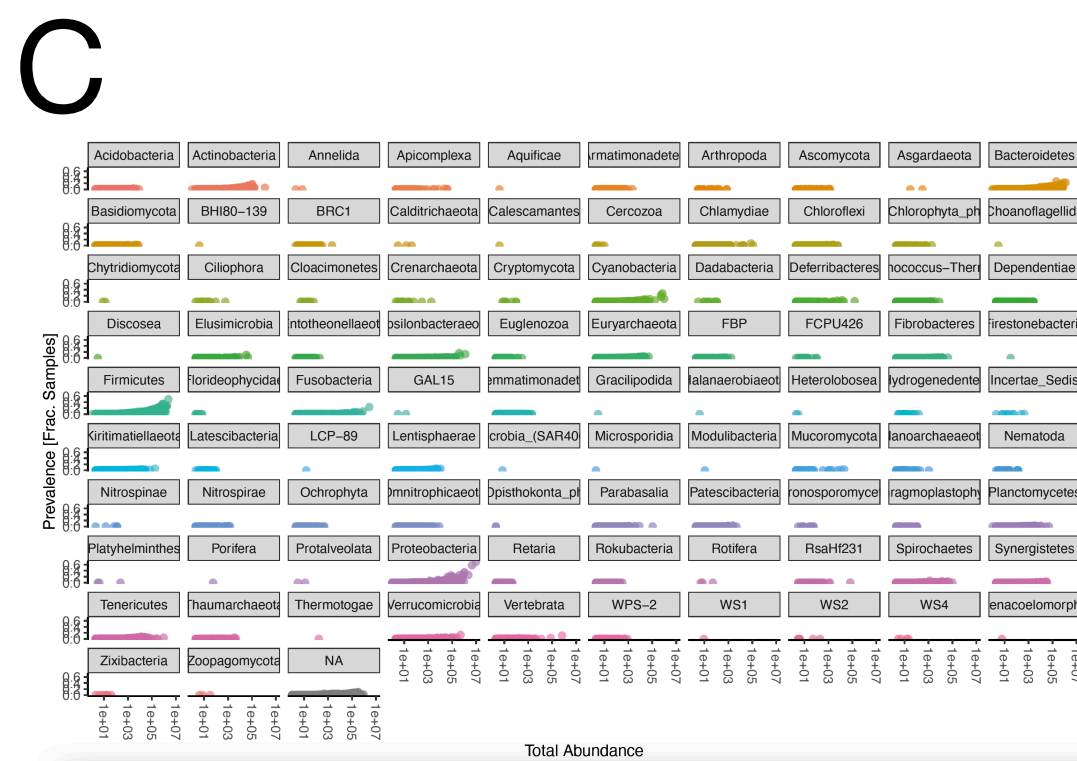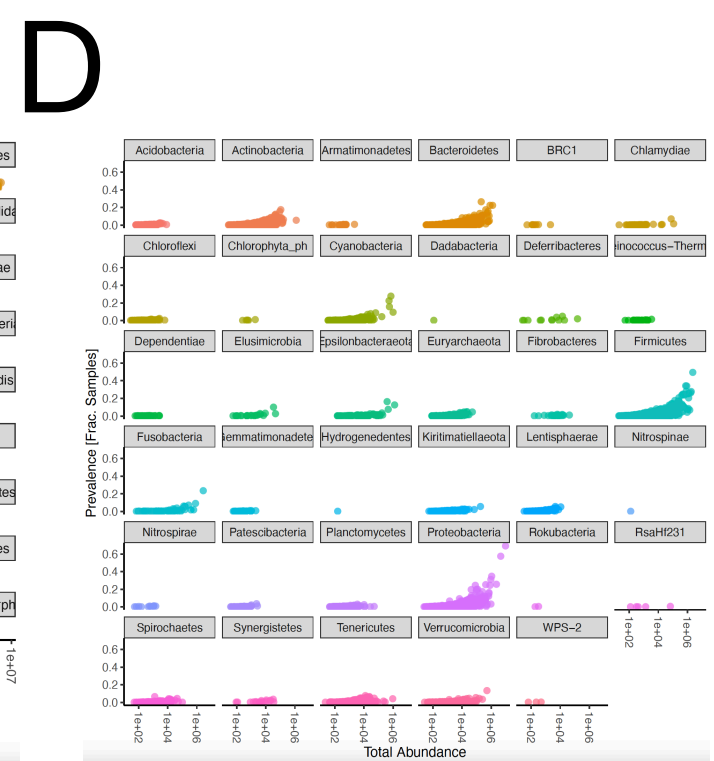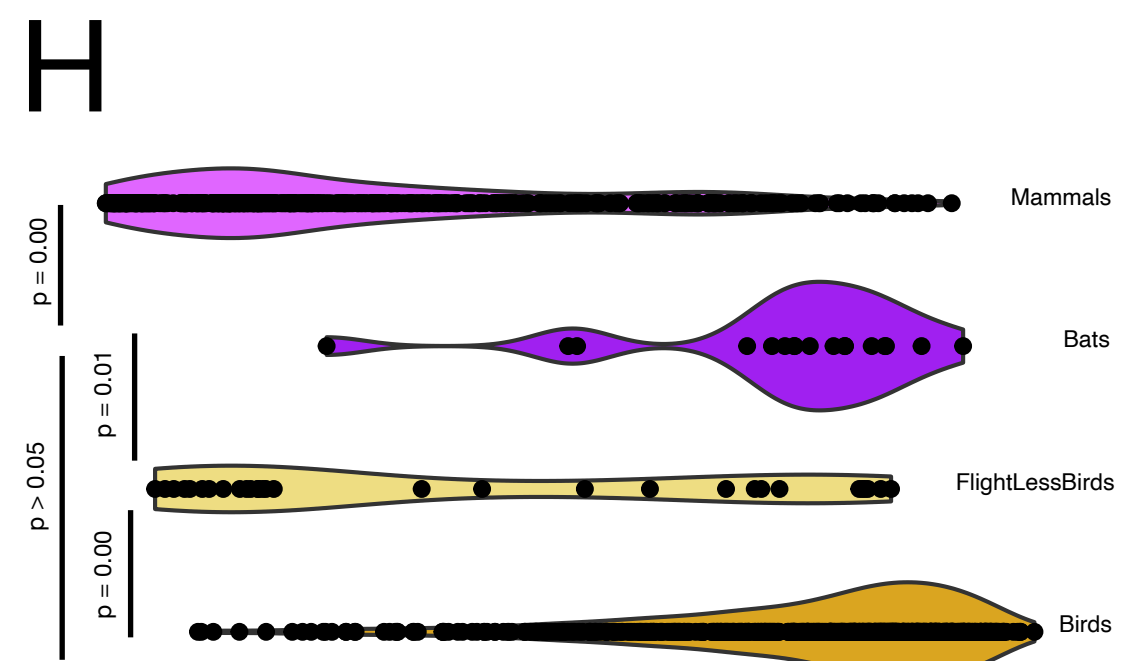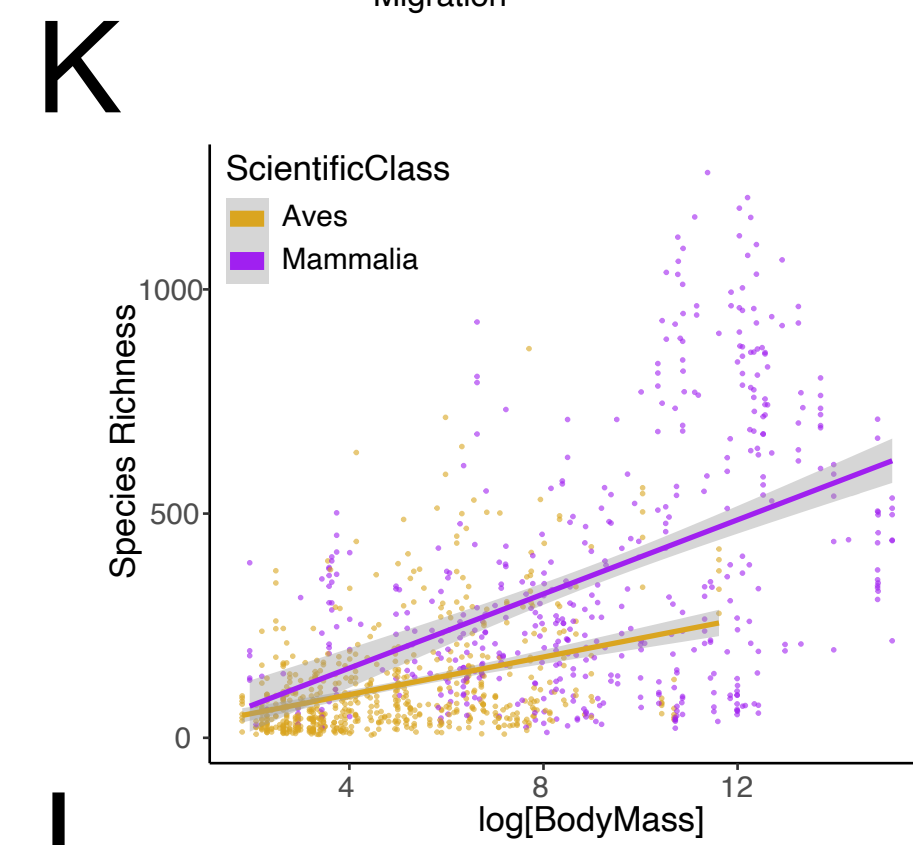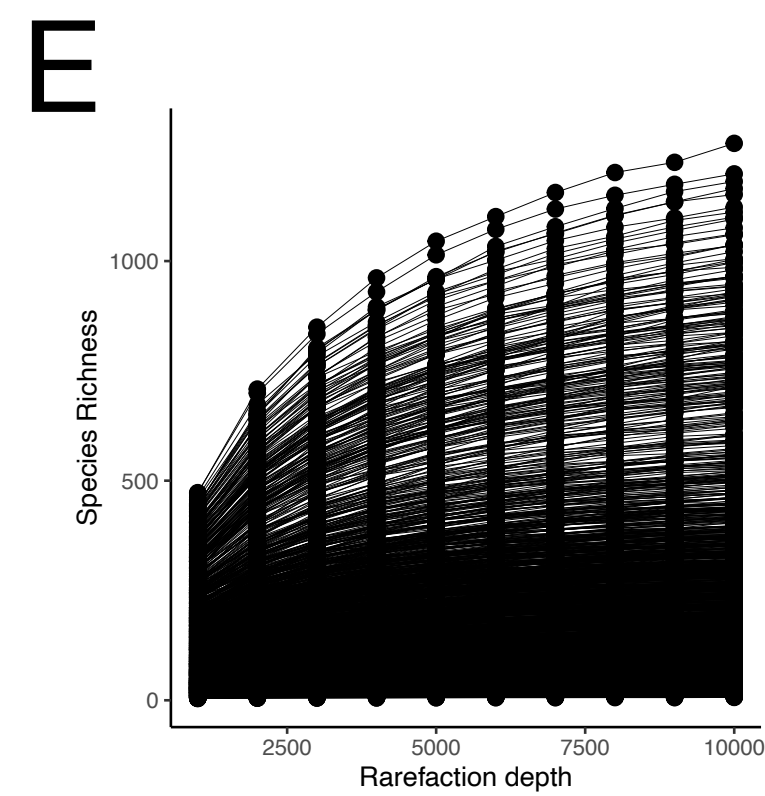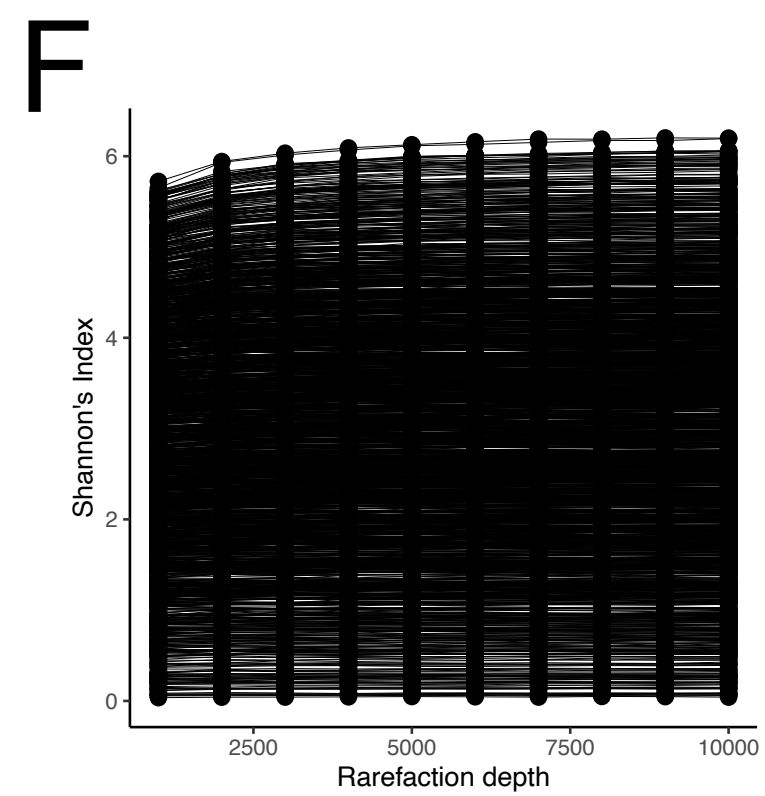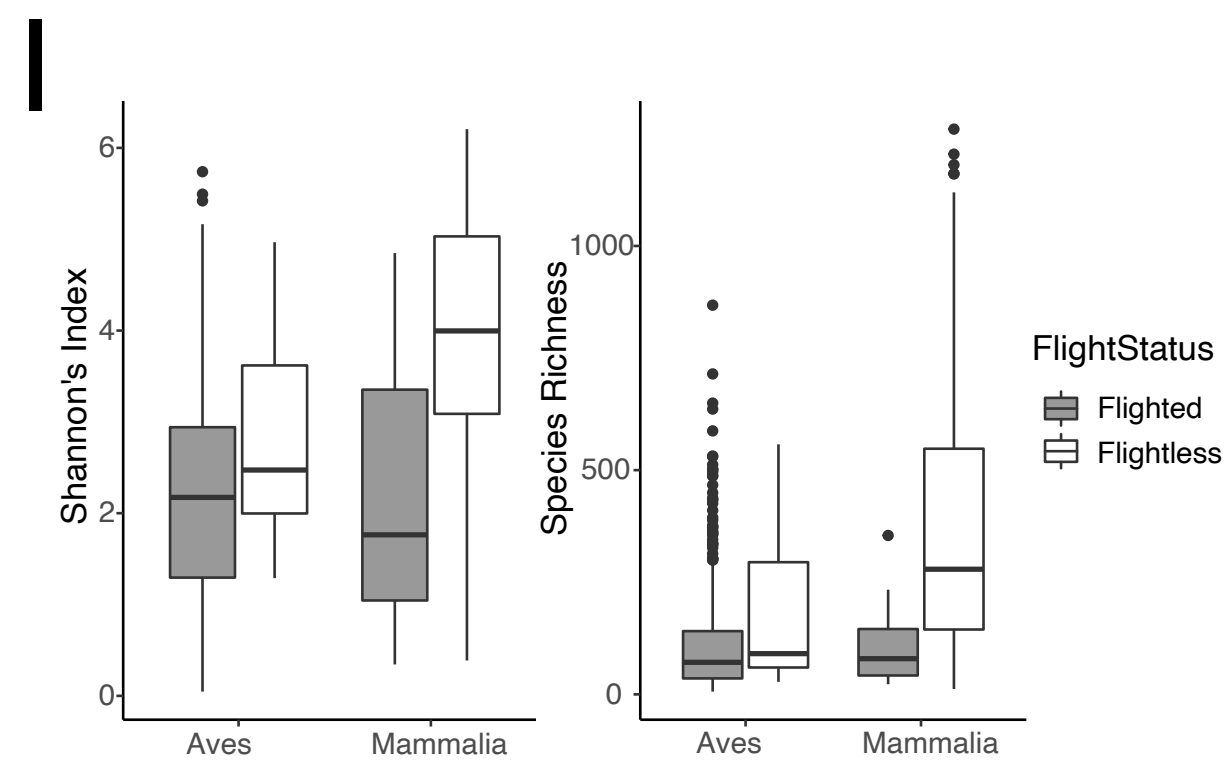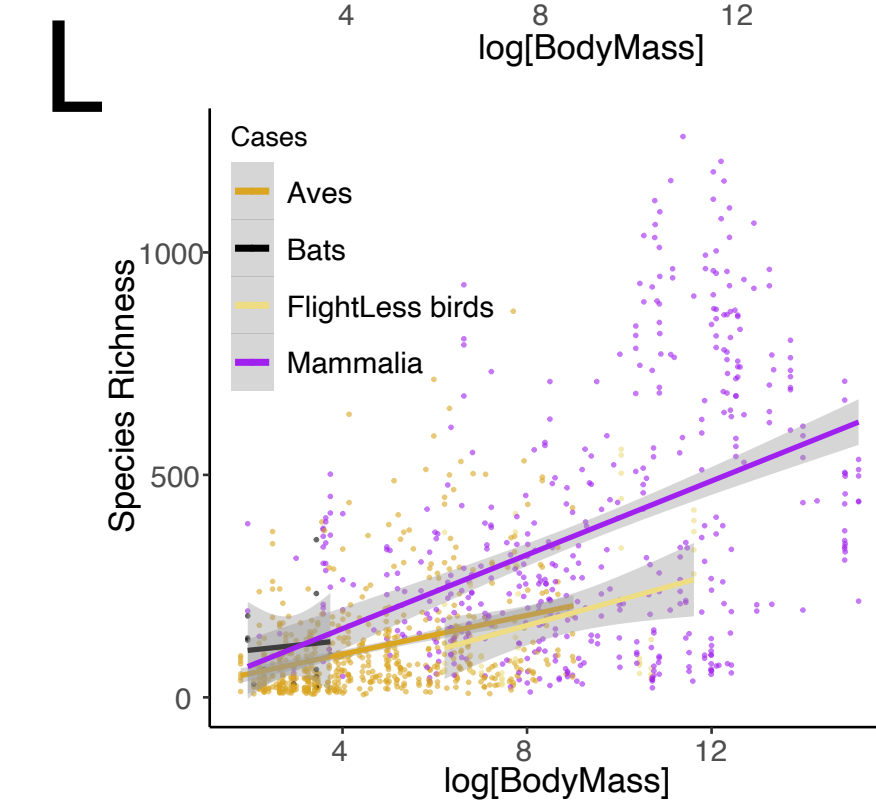

Supplement: pone.0293895.s001.pdf [file pone.0293895.s001.pdf]
